# Supplementary material for: Poly(vinylidene fluoride) nanofibrous mats with covalently attached SiO2 nanoparticles as an ionic liquid host: enhanced ion transport for electrochromic devices and lithium-ion batteries
Source: Royal Society of Chemistry journal article supplement (doi:10.1039/c5ta02154e), 2015-01-01
Supplement: c5ta02154e1.pdf [file c5ta02154e1.pdf]

**Poly(vinylidene fluoride) nanofibrous mats with covalently attached SiO<sub>2</sub> nanoparticles as ionic liquid host: enhanced ion transport for electrochromic device and lithium-ion battery**

Rui Zhou<sup>a</sup>, Wanshuang Liu<sup>a</sup>, Xiayin Yao<sup>a</sup>, Yew Wei Leong<sup>b</sup>, and Xuehong Lu<sup>a,\*</sup>

<sup>a</sup> School of Materials Science and Engineering, Nanyang Technological University, 50 Nanyang Avenue, Singapore 639798

<sup>b</sup> Singapore Institute of Materials Research & Engineering, 3 Research Link, Singapore, 117602

E-mail: [asxhlu@ntu.edu.sg](mailto:asxhlu@ntu.edu.sg); Tel: +65 9847 6690

(Electronic Supplementary Information)

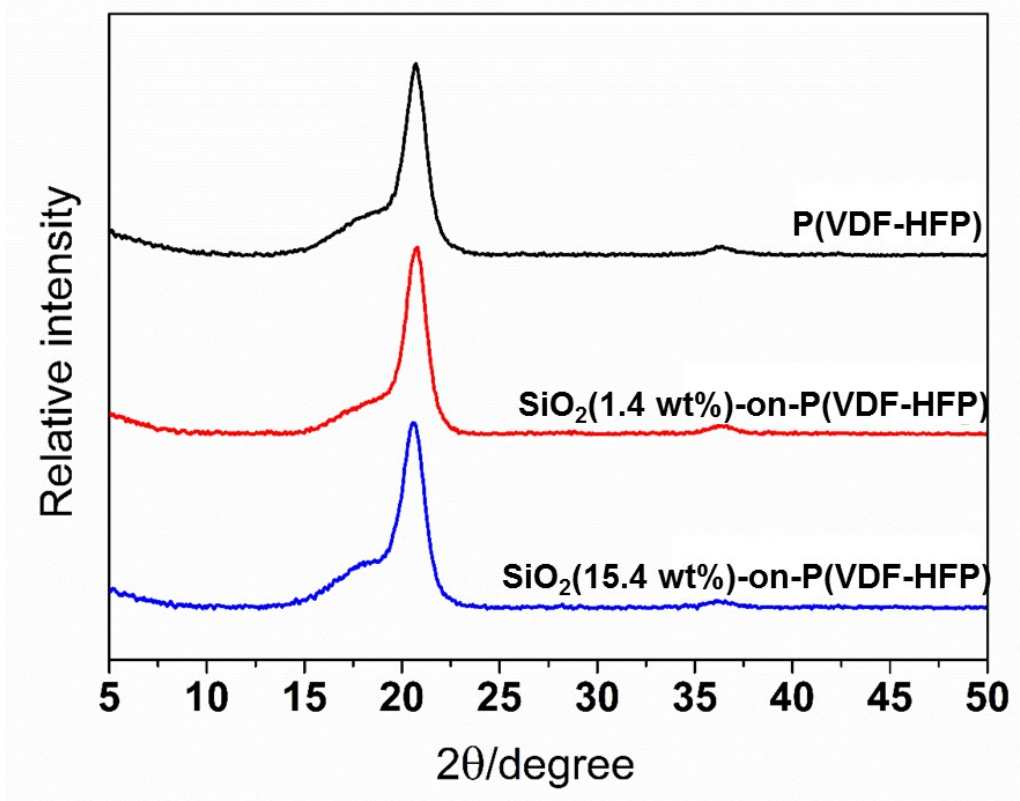

**Fig. S1.** WAXD patterns of SiO<sub>2</sub>-on-P(VDF-HFP) nanofibrous electrospun mats with different SiO<sub>2</sub> content.

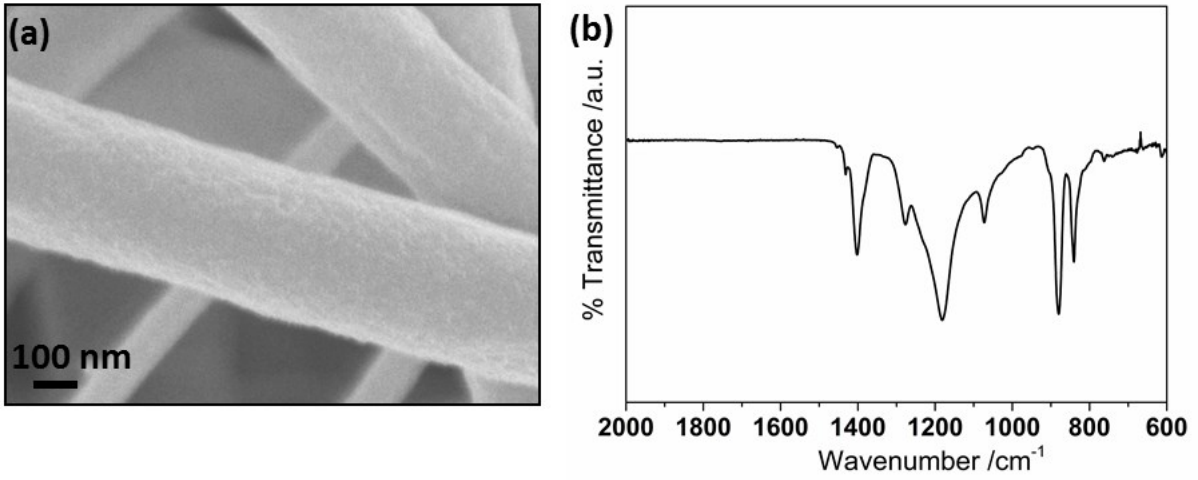

**Fig. S2.** (a) SEM image and (b) FTIR spectrum of the neat P(VDF-HFP) electrospun mat after sol-gel process.

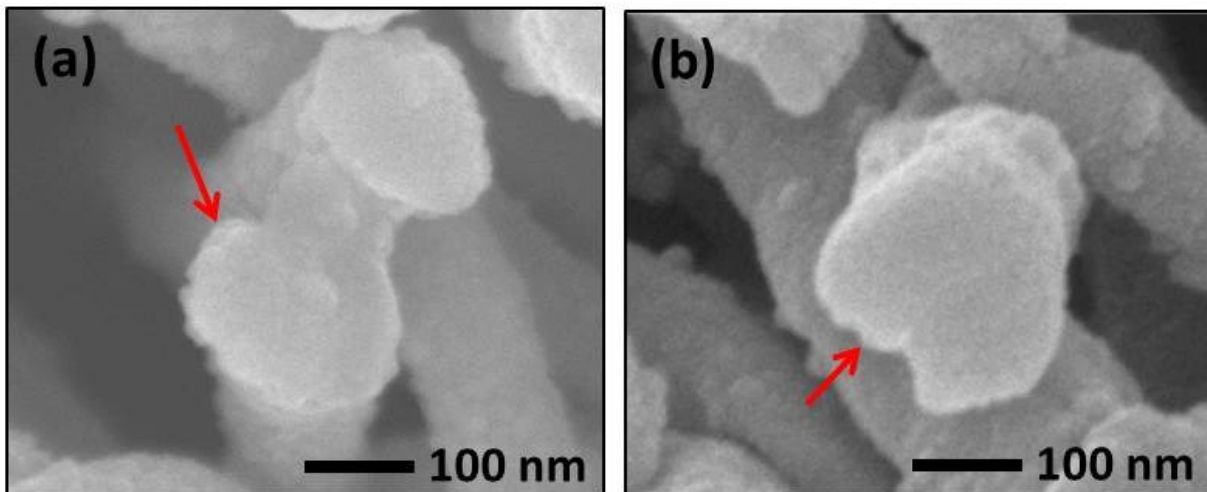

**Fig. S3.** SEM images of the cross-section area of SiO<sub>2</sub>-on-P(VDF-HFP) fibers.

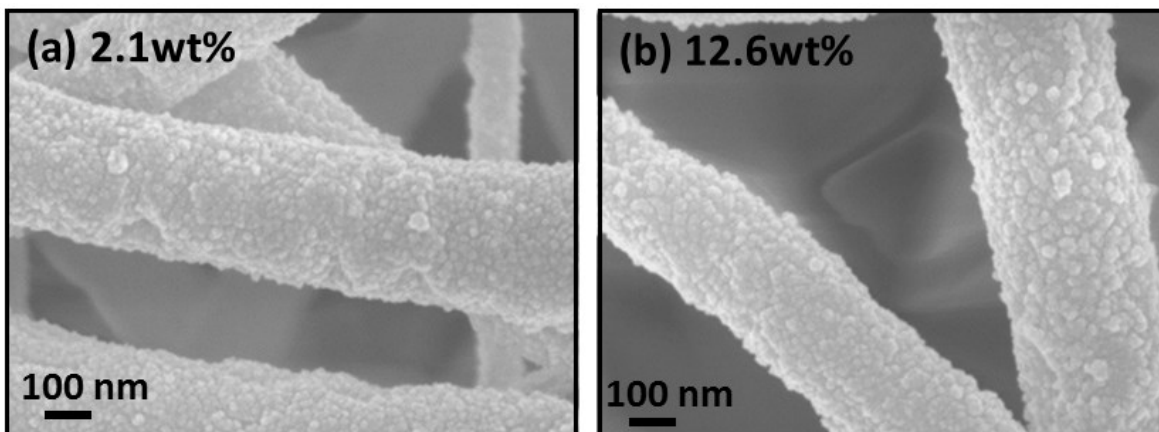

**Fig. S4.** SEM images of SiO<sub>2</sub>-on-P(VDF-HFP) nanofibrous electrospun mats with (a) 2.1 wt% and (b) 12.6 wt% SiO<sub>2</sub>.

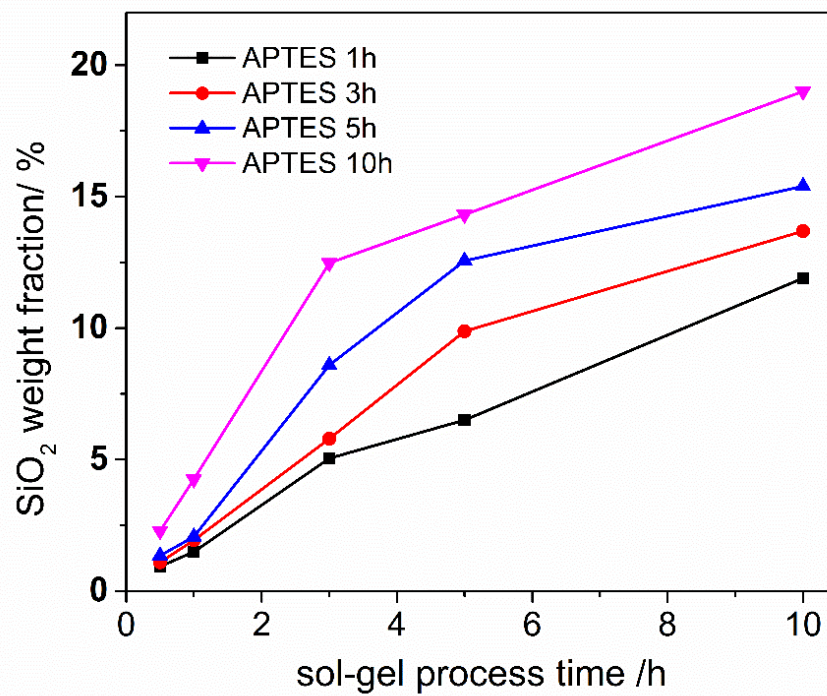

**Fig. S5.** SiO<sub>2</sub> contents in the hybrid mats for different silane (APTES) grafting time and sol-gel processing time.

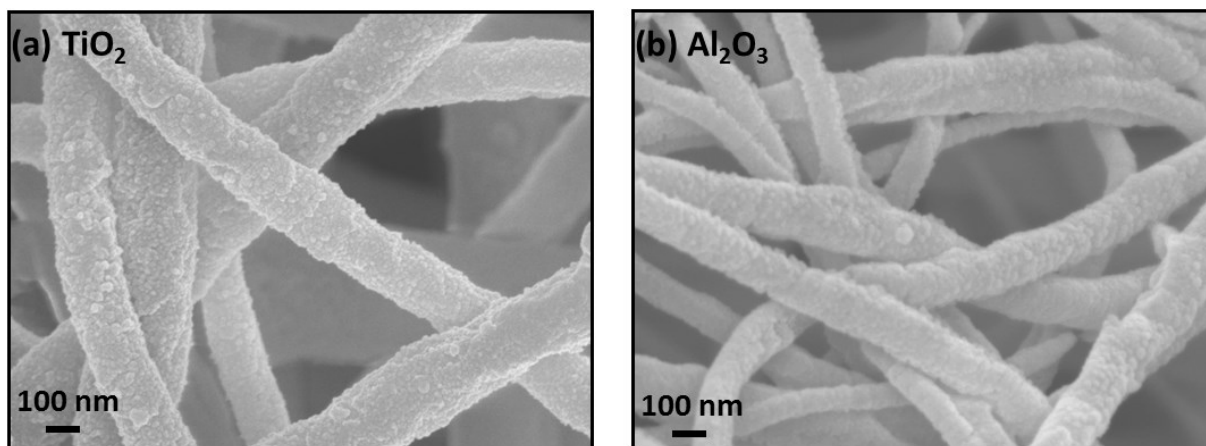

**Fig. S6.** SEM images of P(VDF-HFP) nanofibrous electrospun mats with 1.5 wt% surface-attached  $\text{TiO}_2$  and  $\text{Al}_2\text{O}_3$ , respectively.

**Table S1.** Electrolyte uptake and ionic conductivity of electrospun mats after loading with BMIM<sup>+</sup>BF<sub>4</sub><sup>-</sup> (measured at 20 °C).

| Electrospun mat                        | Electrolyte uptake (%) | Ionic conductivity (mS cm <sup>-1</sup> ) |
|----------------------------------------|------------------------|-------------------------------------------|
| Neat P(VDF-HFP)                        | 440                    | 2.6±0.2                                   |
| 1.4 wt% SiO <sub>2</sub>               | 500                    | 7.8±0.4                                   |
| 1.5 wt% TiO <sub>2</sub>               | 460                    | 5.7±0.3                                   |
| 1.5 wt% Al <sub>2</sub> O <sub>3</sub> | 450                    | 4.8±0.4                                   |
